# Supplementary material for: Somatic Mutations of PIK3R1 Promote Gliomagenesis
Source: PLoS One. 2012 Nov 14;7(11):e49466. doi: 10.1371/journal.pone.0049466 (PMC3498106; doi:10.1371/journal.pone.0049466)
Supplement: Table S1 — Results of sequencing the PIK3R1 and PIK3CA loci in 28 human GBM cell lines. (XLS) [file pone.0049466.s001.xls]

## Sheet: Sheet1
Supplemental Table S1 - Results of sequencing the PIK3R1 and PIK3CA loci in 28 human glioma cell lines.
	PIK3R1	PIK3CA
A172	wt1	wt
A1207	wt	wt
D247	wt	wt
Hs683	wt	wt
GB1	wt	wt
KNS60	wt	wt
LN18	wt	wt
LN215	wt	wt
LN229	wt	wt
LN235	wt	wt
LN319	wt	wt
LN340	MN563delI	wt
LN382	wt	wt
LN428	D560H	wt
LN443	wt	wt
LN444	wt	wt
LN464	wt	wt
LNZ308	wt	wt
SF763	wt	wt
SF767	wt	E545K
T98G	wt	wt
U87	wt	wt
U118	wt	wt
U138	wt	wt
U178	wt	wt
U251	wt	wt
U343	wt	wt
U373	wt	wt
1wt = wild type
